# Supplementary material
Source: Springer Nature journal article supplement (https://www.springermedizin.de/resource/supplementary/12885_2005_526_MOESM4_ESM.pdf/9469686)

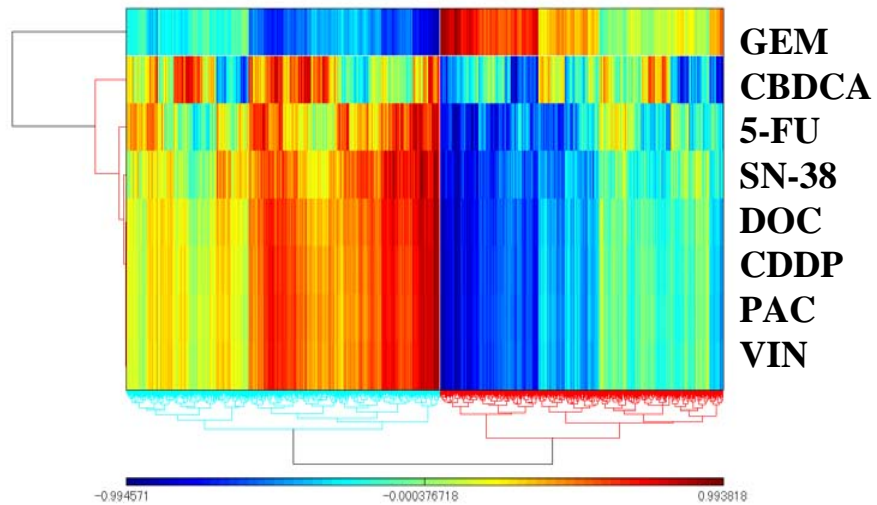

**(A) All lung cancer cell lines**

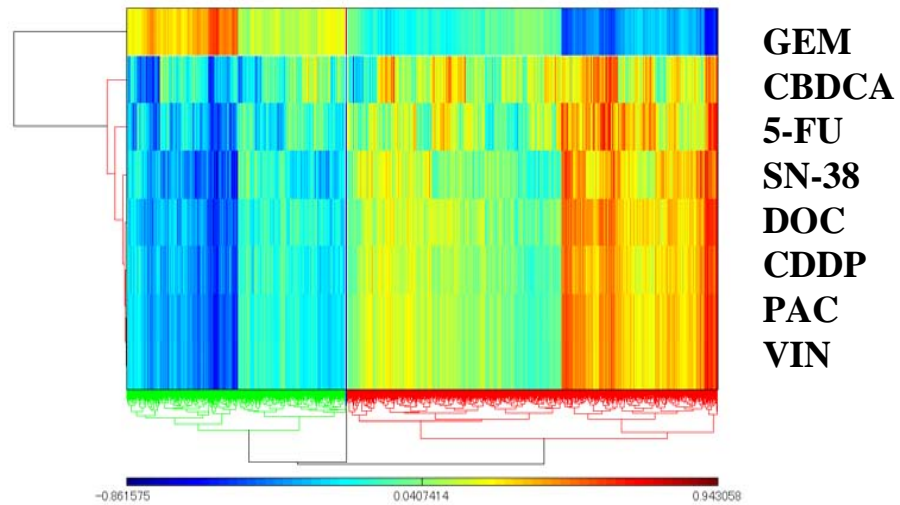

**(B) NSCLC cell lines**

Supplement: MOESM4 [file 9469686]
